# Supplementary material for: Continuous Monitoring Using a Wearable Device Detects Activity‐Induced Heart Rate Changes After Administration of Amphetamine
Source: PubMed Central journal article supplement — Clin Transl Sci. 2019 Sep 27;12(6):677–86. doi: 10.1111/cts.12673 (PMC6853263; doi:10.1111/cts.12673), 2019-09-27
Supplement: CTS-12-677-s002.pdf [file CTS-12-677-s002.pdf]

Figure S2. The duration and timing of the Actiwatch and BodyGuardian devices worn by each study subject. The blue line depicts the BodyGuardian device; the orange line depicts the Actiwatch device. D stands for Day, P stands for Period, P1:D2 indicates Period 1 Day 2; I stands for interval, I:D1 indicates Day 1 during the interval between the dosing periods; D after the second dosing period stands for discharge, D:D1 indicates Day 2 after the discharge from the study unit.

57001-017

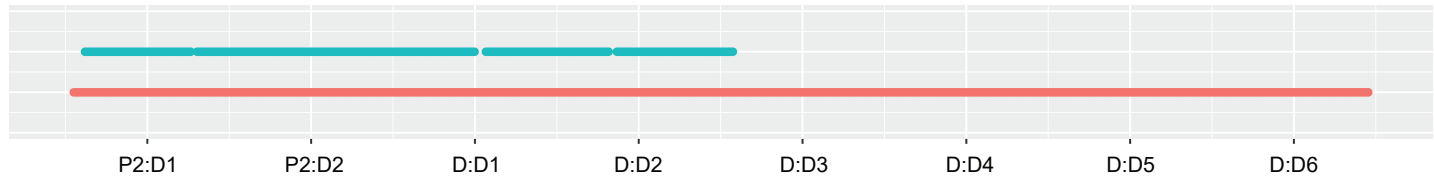

57001-022

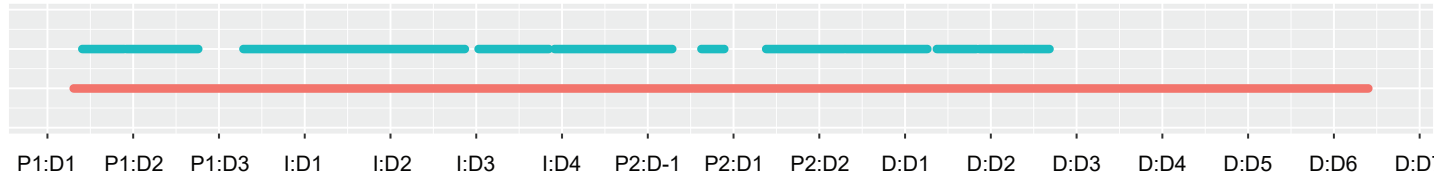

57001-024

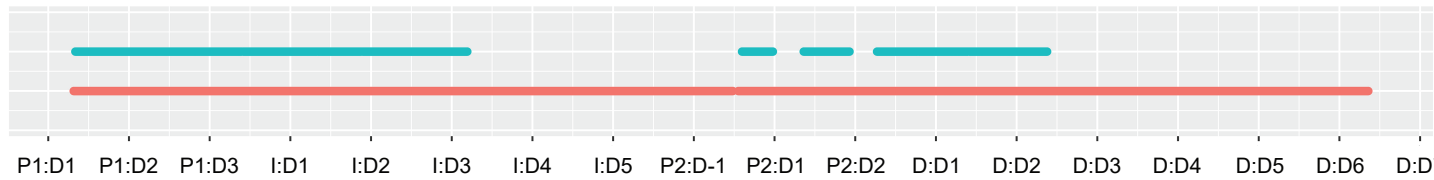

57001-025

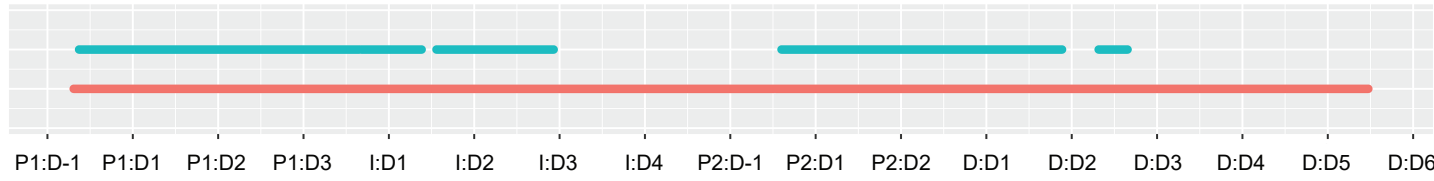

57001-028

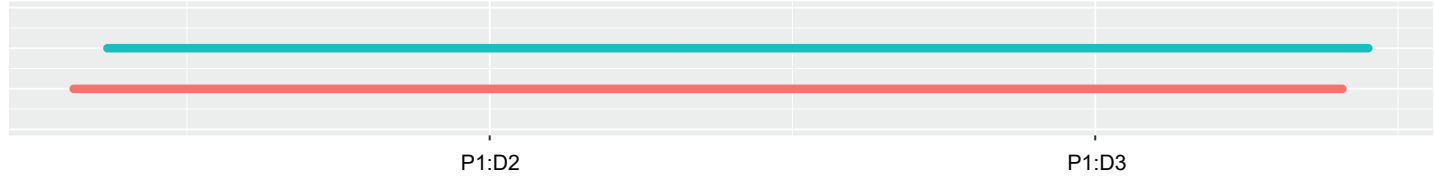

BodyGuardian  
Actiwatch
