# Supplementary material for: Continuous Monitoring Using a Wearable Device Detects Activity‐Induced Heart Rate Changes After Administration of Amphetamine
Source: PubMed Central journal article supplement — Clin Transl Sci. 2019 Sep 27;12(6):677–86. doi: 10.1111/cts.12673 (PMC6853263; doi:10.1111/cts.12673), 2019-09-27

Figure S4. Physical activity correlation during M10 periods. D stands for Day, P stands for Period, P1:D2 indicates Period 1 Day 2; I stands for interval, I:D1 indicates Day 1 during the interval between the dosing periods.

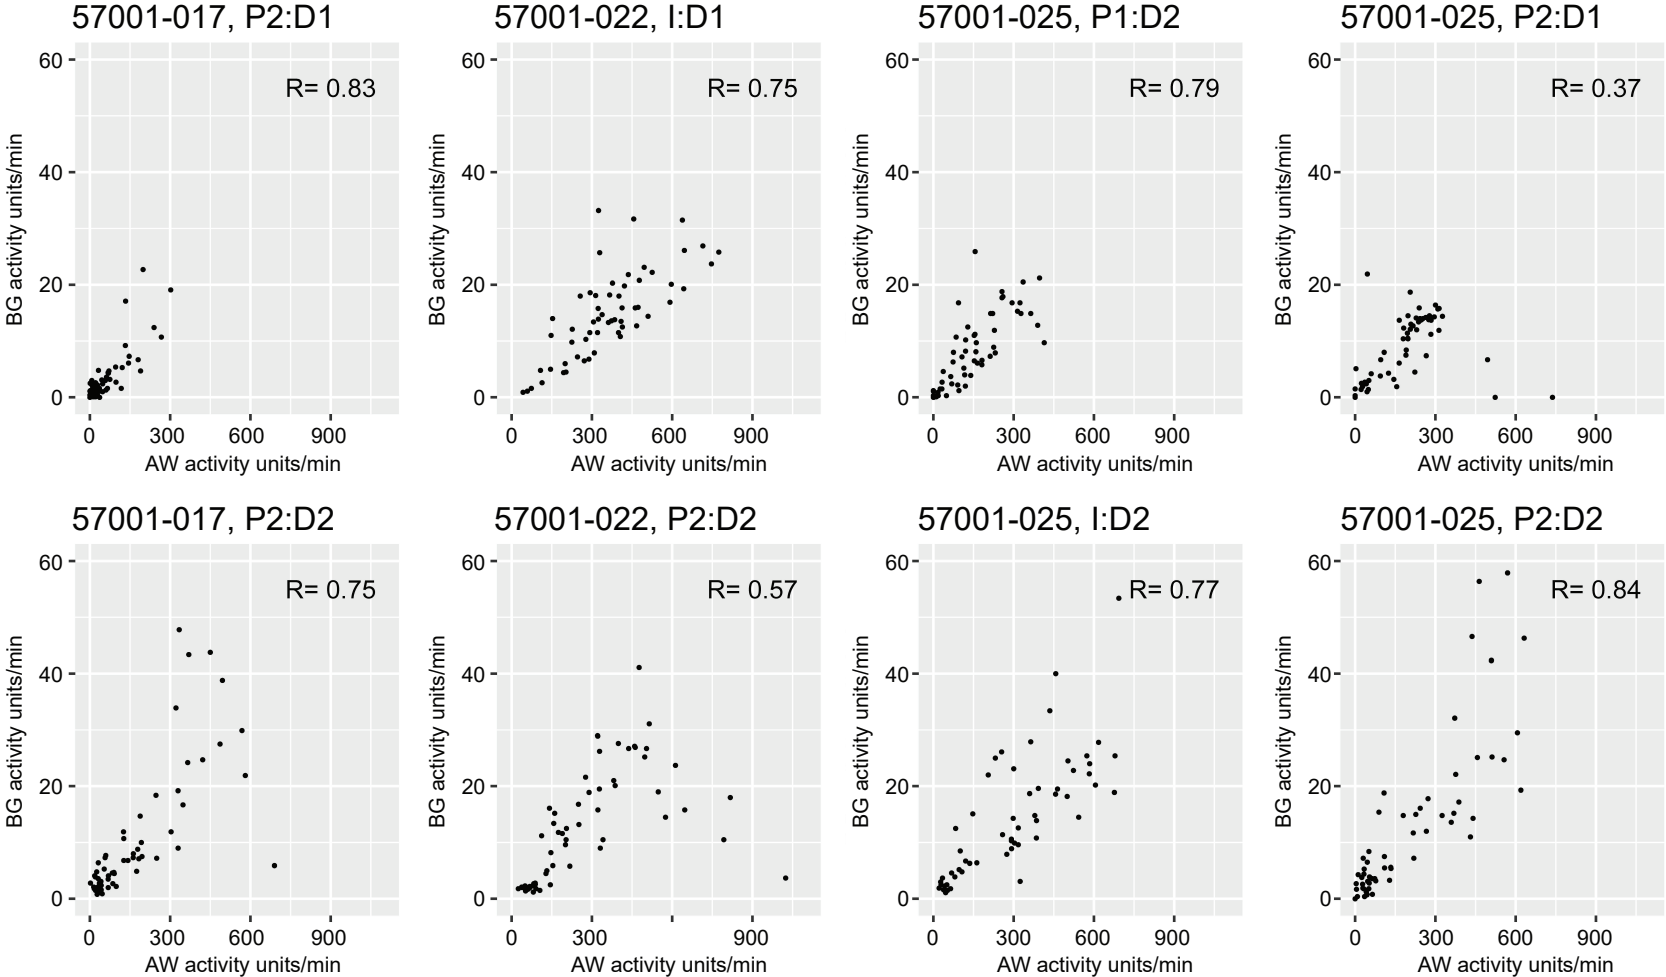

Supplement: CTS-12-677-s004.pdf [file CTS-12-677-s004.pdf]
