# Supplementary material for: Continuous Monitoring Using a Wearable Device Detects Activity‐Induced Heart Rate Changes After Administration of Amphetamine
Source: PubMed Central journal article supplement — Clin Transl Sci. 2019 Sep 27;12(6):677–86. doi: 10.1111/cts.12673 (PMC6853263; doi:10.1111/cts.12673), 2019-09-27

Figure S5. Examples of monitoring the BodyGuardian device being worn: Activity counts from BodyGuardian device (A, C and E); HR (B, D and F). D stands for Day, P stands for Period, P1:D2 indicates Period 1 Day 2; I stands for interval, I:D1 indicates Day 1 during the interval between the dosing periods.

**A**

BodyGuarding Activity subject 57001-0024 I:D2

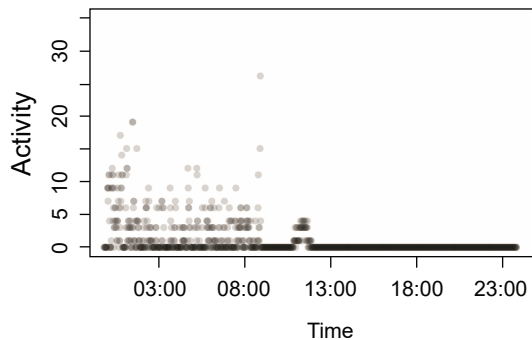

**C**

BodyGuarding Activity subject 57001-022 I:D4

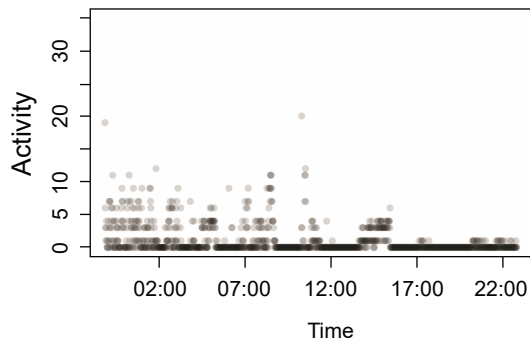

**E**

BodyGuarding Activity subject 57001-025 P2:D1

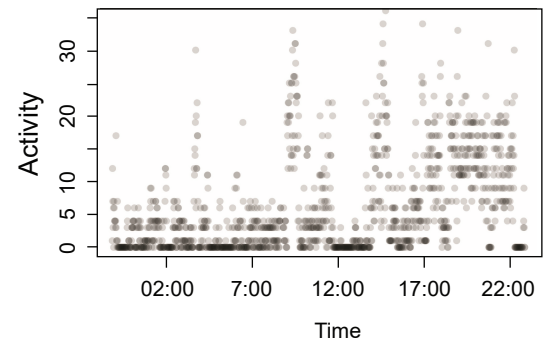

**B**

BodyGuarding HR subject 57001-0024 I:D2

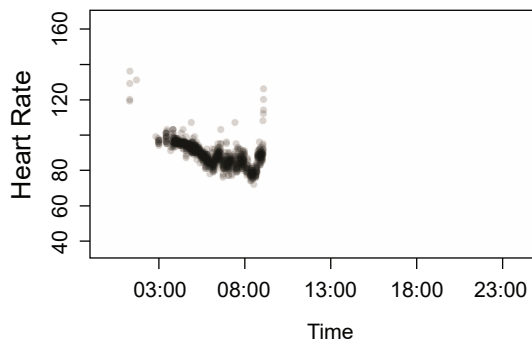

**D**

BodyGuarding HR subject 57001-022 I:D4

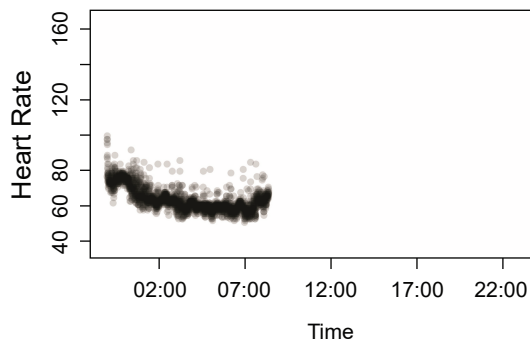

**F**

BodyGuarding HR subject 57001-025 P2:D1

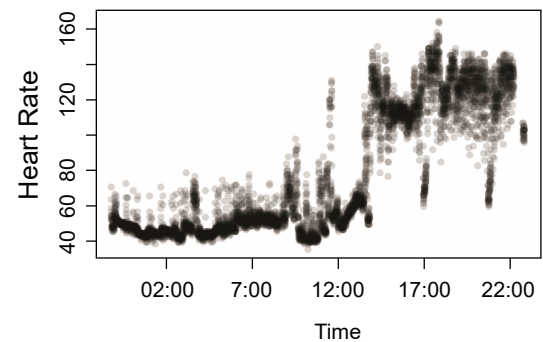

Supplement: CTS-12-677-s005.pdf [file CTS-12-677-s005.pdf]
