# Supplementary material for: Continuous Monitoring Using a Wearable Device Detects Activity‐Induced Heart Rate Changes After Administration of Amphetamine
Source: PubMed Central journal article supplement — Clin Transl Sci. 2019 Sep 27;12(6):677–86. doi: 10.1111/cts.12673 (PMC6853263; doi:10.1111/cts.12673), 2019-09-27

Figure S6. BodyGuardian HR measurements post amphetamine challenge during rest and active periods in subjects 57001-017 (A and B) and 57001-022 (C and D). Blue points are derived from the regression analysis; the black points are the actual device derived data. D stands for Day, P stands for Period, P1:D2 indicates Period 1 Day 2.

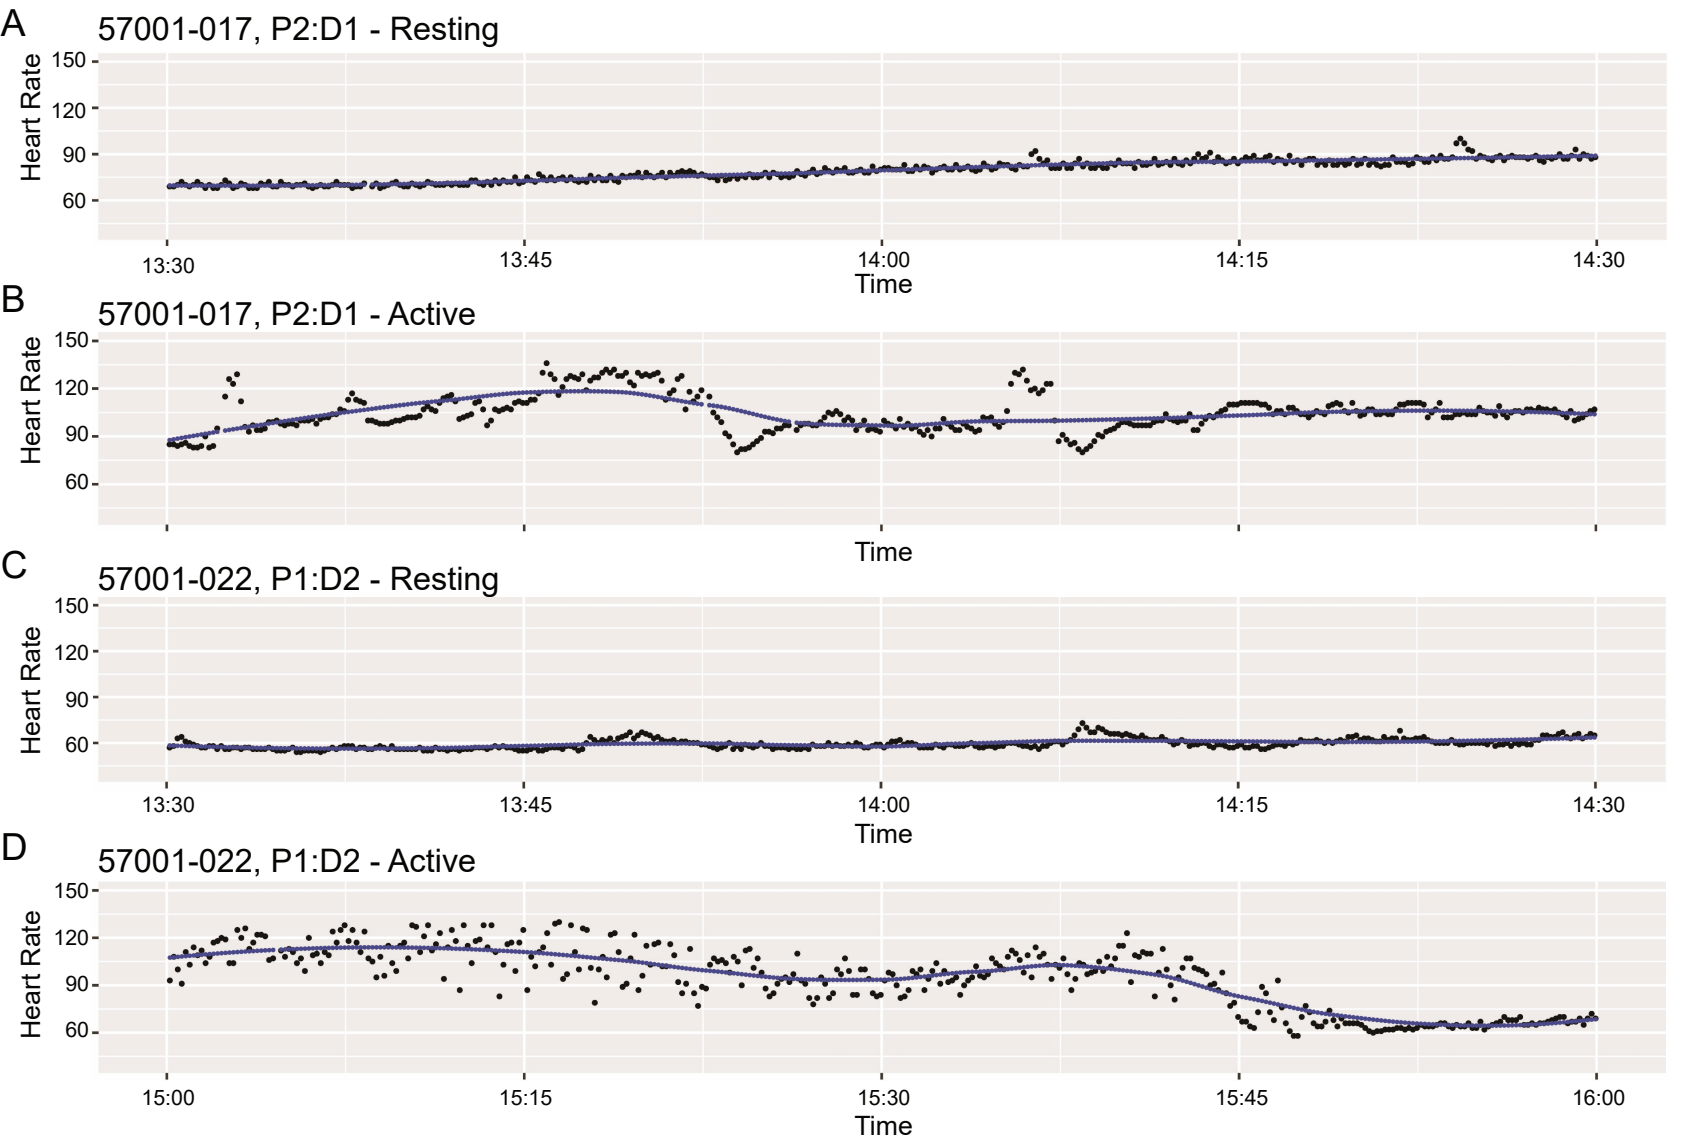

Supplement: CTS-12-677-s006.pdf [file CTS-12-677-s006.pdf]
