# Supplementary material for: Continuous Monitoring Using a Wearable Device Detects Activity‐Induced Heart Rate Changes After Administration of Amphetamine
Source: PubMed Central journal article supplement — Clin Transl Sci. 2019 Sep 27;12(6):677–86. doi: 10.1111/cts.12673 (PMC6853263; doi:10.1111/cts.12673), 2019-09-27
Supplement: CTS-12-677-s007.pdf [file CTS-12-677-s007.pdf]

Table S1. Demographics of study subjects.

| <b>Variable</b> | <b>Units</b>      | <b>Mean</b> | <b>Median</b> | <b>SD</b> | <b>Minimum</b> | <b>Maximum</b> |
|-----------------|-------------------|-------------|---------------|-----------|----------------|----------------|
| Age             | years             | 45.6        | 47.0          | 9.0       | 34.0           | 55.0           |
| Height          | cm                | 176.6       | 177.0         | 7.6       | 164.0          | 183.0          |
| Weight          | kg                | 85.9        | 86.9          | 6.5       | 78.1           | 95.2           |
| BMI             | kg/m <sup>2</sup> | 27.6        | 27.9          | 1.5       | 26.0           | 29.1           |
