# Supplementary material for: Continuous Monitoring Using a Wearable Device Detects Activity‐Induced Heart Rate Changes After Administration of Amphetamine
Source: PubMed Central journal article supplement — Clin Transl Sci. 2019 Sep 27;12(6):677–86. doi: 10.1111/cts.12673 (PMC6853263; doi:10.1111/cts.12673), 2019-09-27
Supplement: CTS-12-677-s008.pdf [file CTS-12-677-s008.pdf]

Table S2. Completeness of data collection for the BodyGuardian and the Actiwatch devices.

| <b>BodyGuardian</b> |                             |                |                |                             |                |                |
|---------------------|-----------------------------|----------------|----------------|-----------------------------|----------------|----------------|
| <b>Subject ID</b>   | <b>Confinement Period 1</b> |                |                | <b>Confinement Period 2</b> |                |                |
|                     | <b>In-unit</b>              | <b>At-home</b> | <b>Overall</b> | <b>In-unit</b>              | <b>At-home</b> | <b>Overall</b> |
| 57001-022           | 81%                         | 96%            | 84%            | 53%                         | 85%            | 79%            |
| 57001-024           | 95%                         | 77%            | 89%            | 56%                         | 92%            | 73%            |
| 57001-025           | 93%                         | 90%            | 92%            | 95%                         | 69%            | 83%            |
| 57001-028*          | 77%                         | NA             | 77%            | NA                          | NA             | NA             |
| 57001-017**         | NA                          | NA             | NA             | 92%                         | 89%            | 93%            |

| <b>Actiwatch</b>  |                             |                |                |                             |                |                |
|-------------------|-----------------------------|----------------|----------------|-----------------------------|----------------|----------------|
| <b>Subject ID</b> | <b>Confinement Period 1</b> |                |                | <b>Confinement Period 2</b> |                |                |
|                   | <b>In-unit</b>              | <b>At-home</b> | <b>Overall</b> | <b>In-unit</b>              | <b>At-home</b> | <b>Overall</b> |
| 57001-022         | 96%                         | 100%           | 99%            | 100%                        | 100%           | 100%           |
| 57001-024         | 98%                         | 100%           | 100%           | 100%                        | 100%           | 100%           |
| 57001-025         | 98%                         | 100%           | 99%            | 100%                        | 100%           | 100%           |
| 57001-028*        | 96%                         | NA             | 96%            | NA                          | NA             | NA             |
| 57001-017**       | NA                          | NA             | NA             | 100%                        | 100%           | 100%           |
