# Supplementary material for: Continuous Monitoring Using a Wearable Device Detects Activity‐Induced Heart Rate Changes After Administration of Amphetamine
Source: PubMed Central journal article supplement — Clin Transl Sci. 2019 Sep 27;12(6):677–86. doi: 10.1111/cts.12673 (PMC6853263; doi:10.1111/cts.12673), 2019-09-27
Supplement: CTS-12-677-s009.pdf [file CTS-12-677-s009.pdf]

Table S3. Summary of time gap with missing data.

| <b>Subject ID</b> | <b>Gap count</b> | <b>Total gap time (hours)</b> | <b>Median gap length (sec)</b> | <b>Longest gap (hours)</b> |
|-------------------|------------------|-------------------------------|--------------------------------|----------------------------|
| 57001-017         | 21               | 5.3                           | 90                             | 1.7                        |
| 57001-022         | 113              | 69.7                          | 90                             | 30.6                       |
| 57001-024         | 117              | 132.0                         | 120                            | 102.3                      |
| 57001-025         | 112              | 86.8                          | 100                            | 64.2                       |
| 57001-028         | 100              | 9.5                           | 90                             | 2.7                        |
