# Supplementary material for: Continuous Monitoring Using a Wearable Device Detects Activity‐Induced Heart Rate Changes After Administration of Amphetamine
Source: PubMed Central journal article supplement — Clin Transl Sci. 2019 Sep 27;12(6):677–86. doi: 10.1111/cts.12673 (PMC6853263; doi:10.1111/cts.12673), 2019-09-27
Supplement: CTS-12-677-s010.pdf [file CTS-12-677-s010.pdf]

Table S4. Percent of epochs with HR measurements < 40 bpm, ≥ 40 and < 45 bpm, ≥45 and <50 bpm.

| <b>Subject ID</b> | <b>% of epochs HR&lt; 40 bpm</b> | <b>% of epochs ≥ 40 and &lt; 45 bpm</b> | <b>% of epochs ≥45 and &lt;50 bpm</b> |
|-------------------|----------------------------------|-----------------------------------------|---------------------------------------|
| 57001-017         | 0.00                             | 0.00                                    | 0.01                                  |
| 57001-022         | 0.00                             | 0.00                                    | 0.24                                  |
| 57001-024         | 0.00                             | 0.00                                    | 0.01                                  |
| 57001-025         | 0.20                             | 4.93                                    | 14.78                                 |
| 57001-028         | 0.00                             | 0.00                                    | 0.00                                  |
