# Supplementary material for: Continuous Monitoring Using a Wearable Device Detects Activity‐Induced Heart Rate Changes After Administration of Amphetamine
Source: PubMed Central journal article supplement — Clin Transl Sci. 2019 Sep 27;12(6):677–86. doi: 10.1111/cts.12673 (PMC6853263; doi:10.1111/cts.12673), 2019-09-27
Supplement: CTS-12-677-s011.pdf [file CTS-12-677-s011.pdf]

Table S5. Summary of Total Sleep Time (TST) and Sleep Efficiency (SE).

| <b>Subject ID</b> | <b>Mean TST +/- SD (hours)</b> | <b>Mean SE +/- SD (%)</b> |
|-------------------|--------------------------------|---------------------------|
| 57001-017         | 7.4+/- 2.4                     | 85.2+/-6.5                |
| 57001-022         | 6.7+/- 1.9                     | 80.6+/- 7.7               |
| 57001-024         | 8.3+/- 2.7                     | 82.3+/- 9.1               |
| 57001-025         | 6.5+/- 1.5                     | 80.2+/-7.8                |
| 57001-028         | 4.6+/- 1.1                     | 74.3+/-4.1                |
