# Supplementary figures and images for: Continuous Monitoring Using a Wearable Device Detects Activity‐Induced Heart Rate Changes After Administration of Amphetamine
Source: PubMed Central journal article supplement — Clin Transl Sci. 2019 Sep 27;12(6):677–86. doi: 10.1111/cts.12673 (PMC6853263; doi:10.1111/cts.12673), 2019-09-27

Figure S1. The study schematics

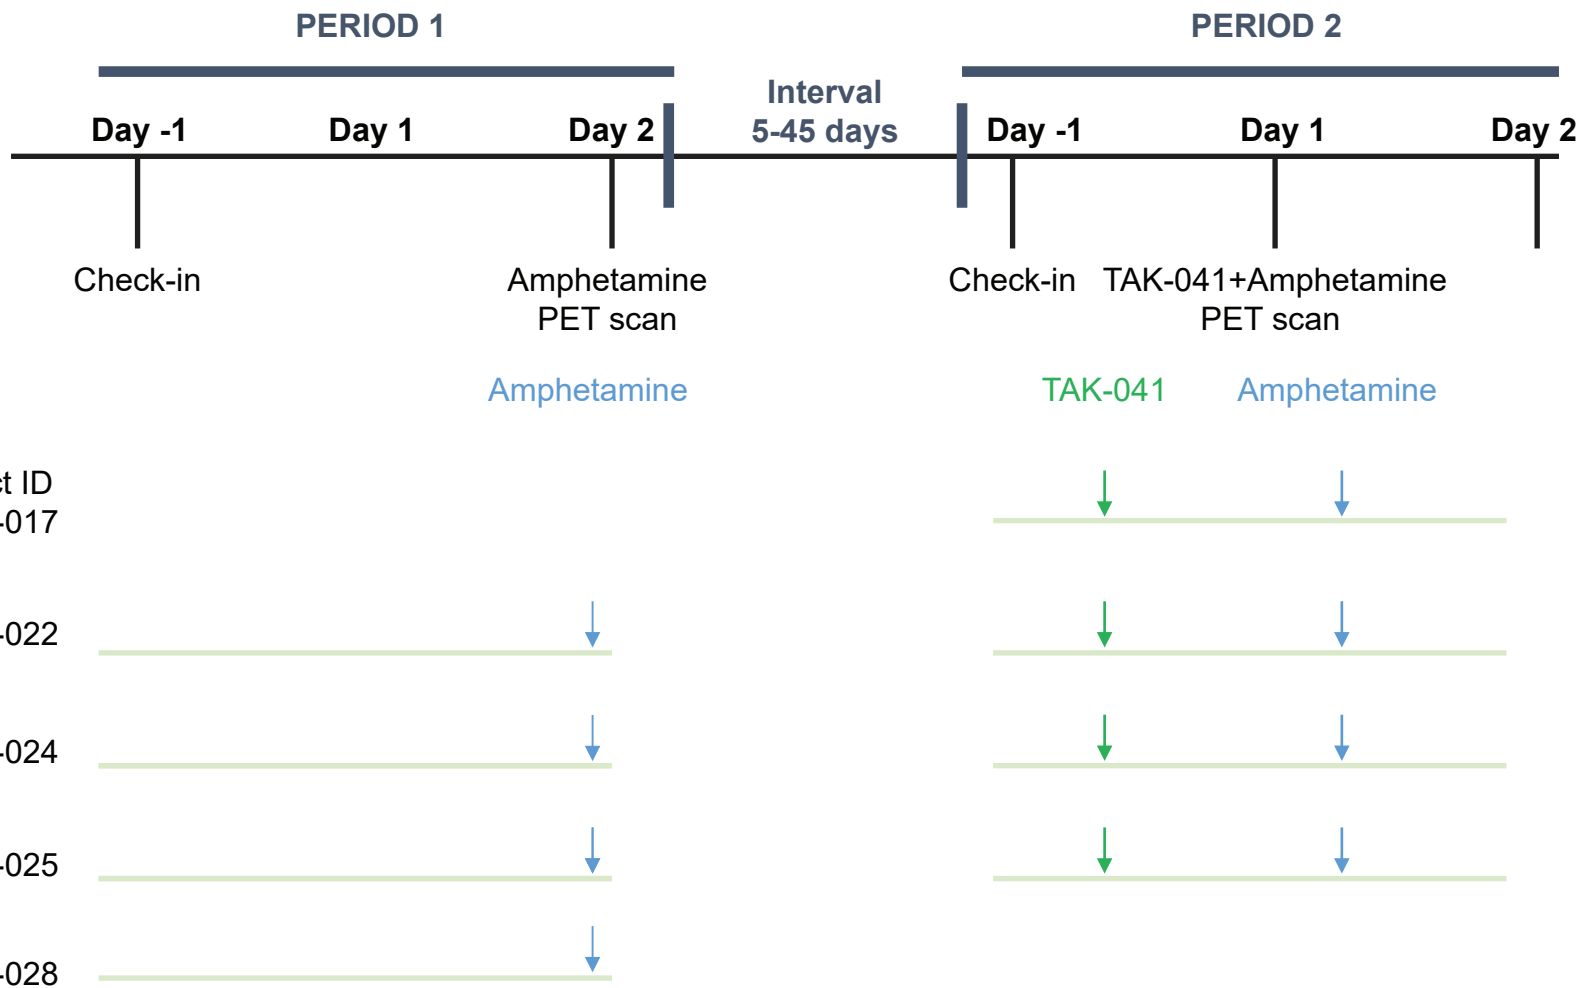

Supplement: CTS-12-677-s001.pdf [file CTS-12-677-s001.pdf]
